# Supplementary material for: Identification and Validation of a Proliferation-Associated Score Model Predicting Survival in Lung Adenocarcinomas
Source: Hindawi journal article supplement (doi:10.1155/2021/3219594), 2021-10-21

**A**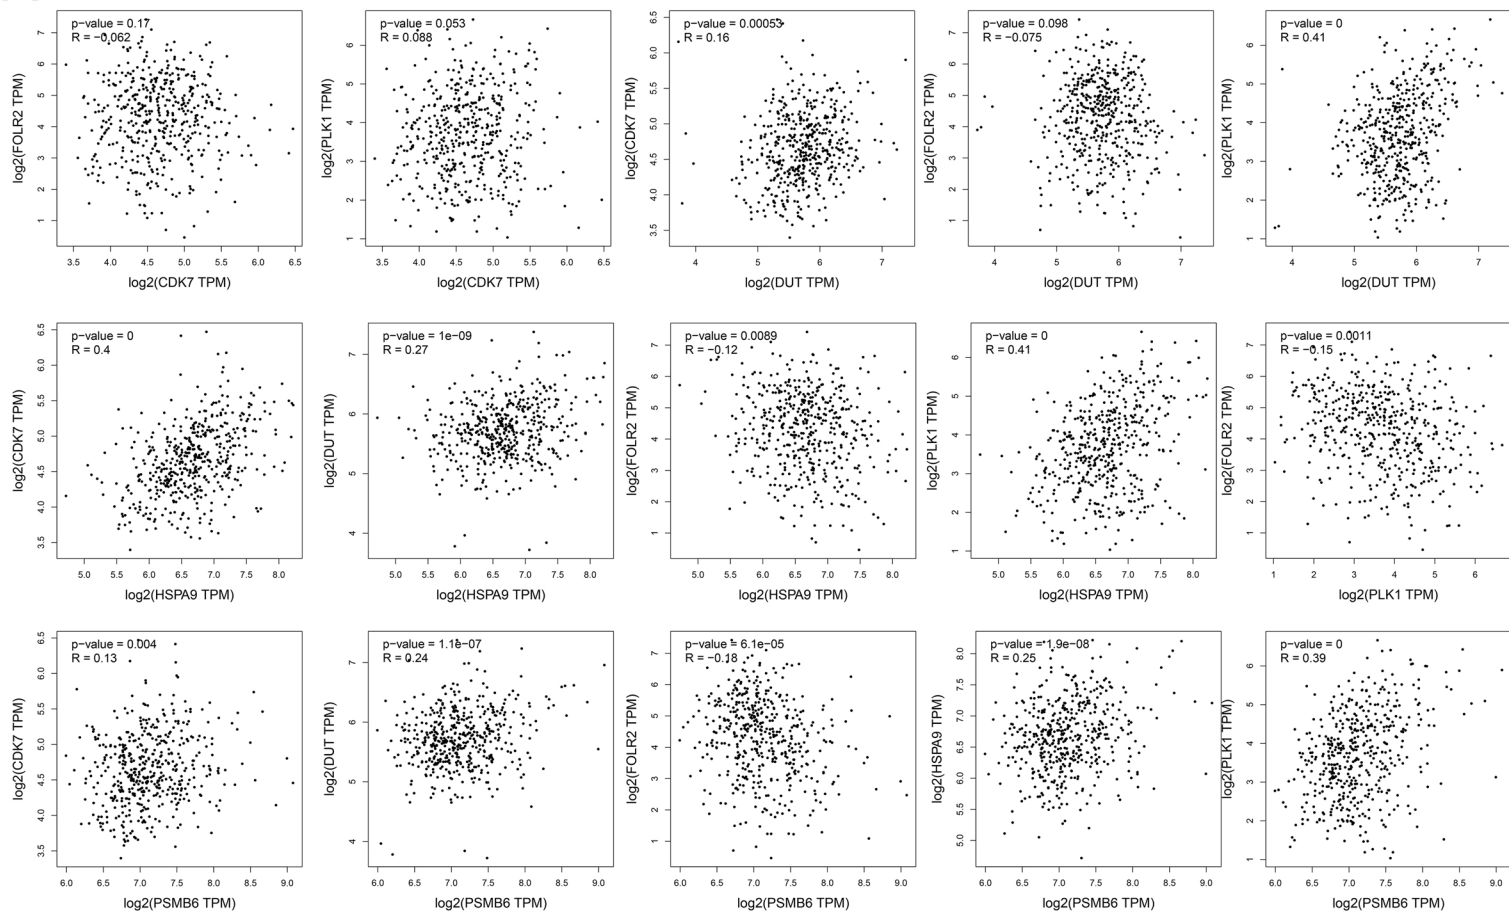**B**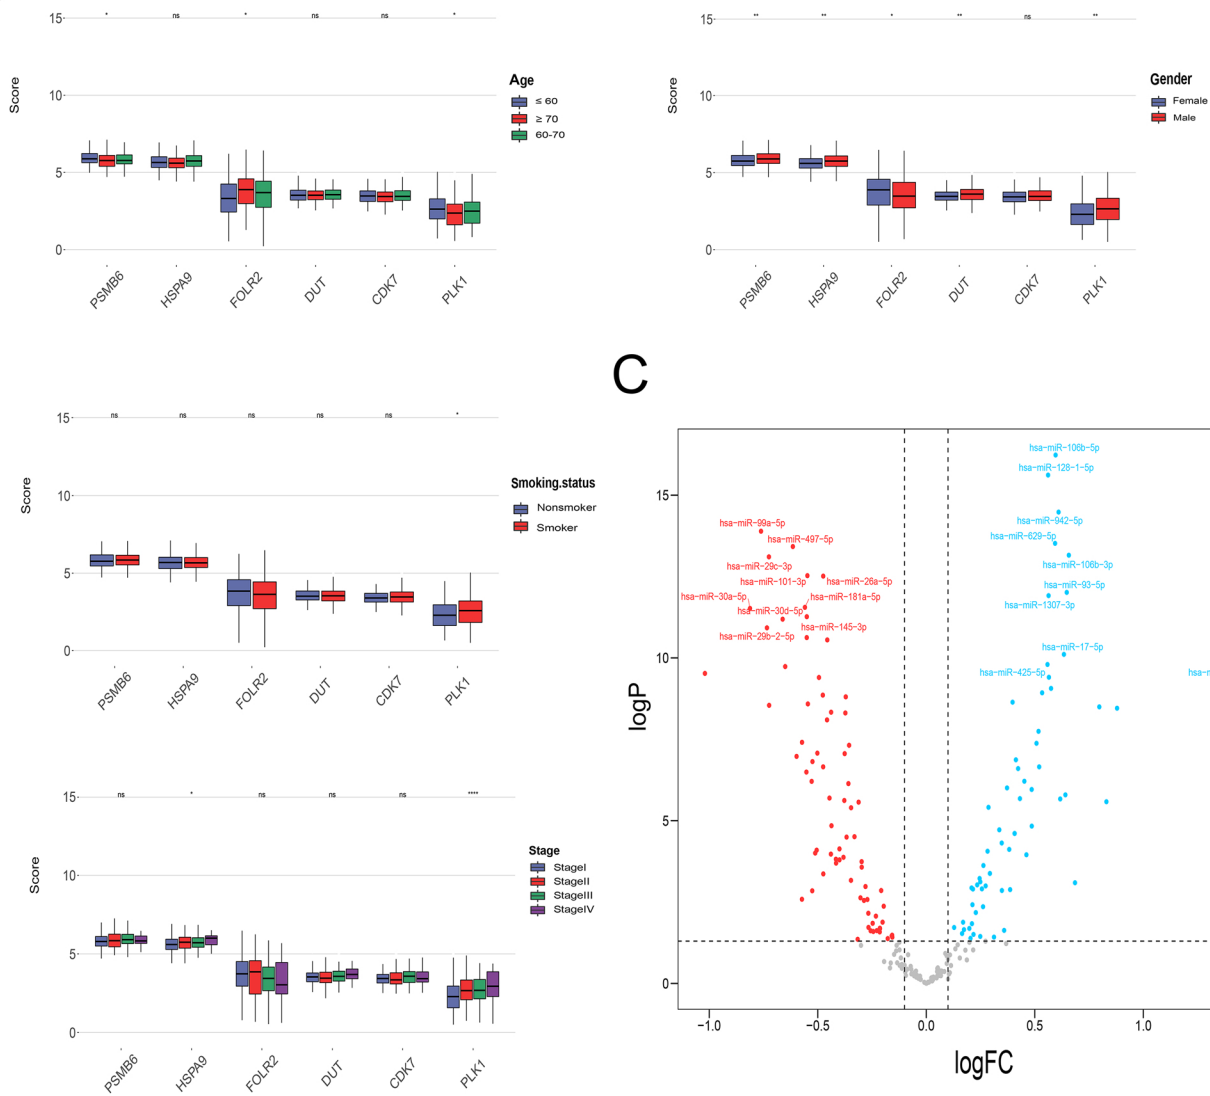**C**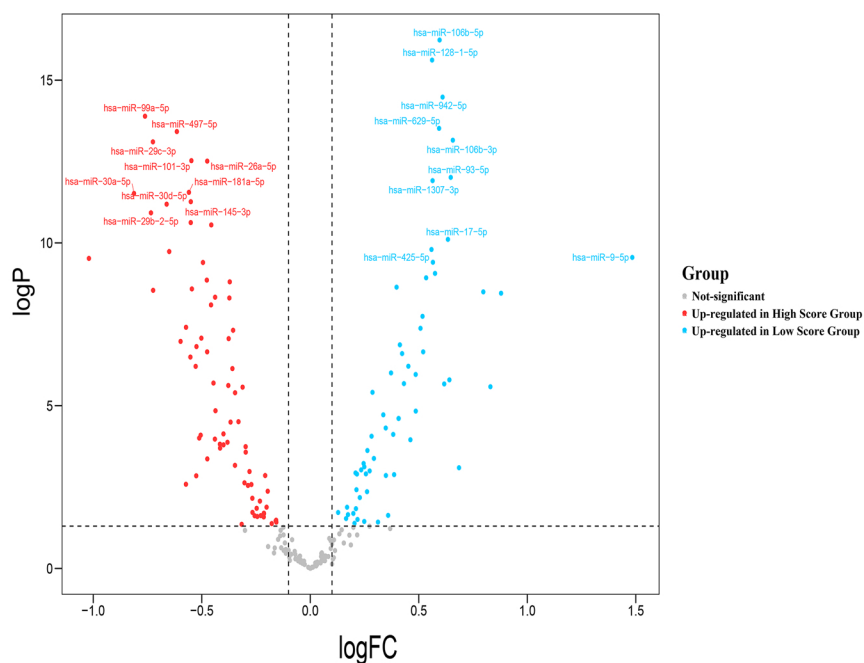

Supplement: f3 [file 3219594.f3.pdf]
